# Supplementary material for: Comparison of Structural, Microstructural, Elastic, and Microplastic Properties of the AAAC (A50) and ACSR (AC50/8) Cables after Various Operation Periods in Power Transmission Lines
Source: MDPI journal article supplement (doi:10.3390/cryst12091267), 2022-09-06
Supplement: s1 [file s1]

# Comparison of Structural, Microstructural, Elastic, and Microplastic Properties of the AAAC (A50) and ACSR (AC50/8) Cables after Various Operation Periods in Power Transmission Lines

Aleksandr A. Levin <sup>1,\*</sup>, Maria V. Narykova <sup>1</sup>, Alexey I. Lihachev <sup>1</sup>, Boris K. Kardashev <sup>1</sup>, Andrej G. Kadomtsev <sup>1</sup>, Nikita D. Prasolov <sup>1</sup>, Andrei G. Panfilov <sup>1</sup>, Roman V. Sokolov <sup>1</sup>, Pavel N. Brunkov <sup>1</sup>, Makhsud M. Sultanov <sup>2</sup>, Alexander V. Strizhichenko <sup>2</sup>, and Ilia A. Boldyrev <sup>2</sup>

<sup>1</sup> Ioffe Institute, Politekhnikeskaya ul. 26, St. Petersburg 194021, Russia

<sup>2</sup> "Moscow Power Engineering Institute", National Research University, Volzhsky branch, Lenina pr. 69, Volzhsky 404110, Russia

\* Correspondence: aleksandr.a.levin@mail.ioffe.ru

**Citation:** Levin, A. A.; Narykova, M. V.; Lihachev, A. I.; Kardashev, B. K.; Kadomtsev, A. G.; Prasolov, N. D.; Panfilov, A. G.; Sokolov, R. V.; Brunkov, P. N.; Sultanov, M. M.; Strizhichenko, A. V.; Boldyrev, I. A. Comparison of structural, microstructural, elastic, and microplastic properties of the AAAC (A50) and ACSR (AC50/8) cables after various operation periods in power transmission lines. *Crystals* **2022**, *12*, 1267.

<https://doi.org/10.3390/cryst12091267>

Academic Editor: Ulrich Prah; Sergey Guk; Faisal Qayyum

Received: 12 August 2022

Accepted: 30 August 2022

Published: 6 September 2022

**Publisher's Note:** MDPI stays neutral with regard to jurisdictional claims in published maps and institutional affiliations.

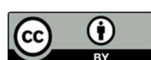

**Copyright:** © 2022 by the authors. Licensee MDPI, Basel, Switzerland. This article is an open access article distributed under the terms and conditions of the Creative Commons Attribution (CC BY) license (<https://creativecommons.org/licenses/by/4.0/>).

## S1. X-ray diffraction details

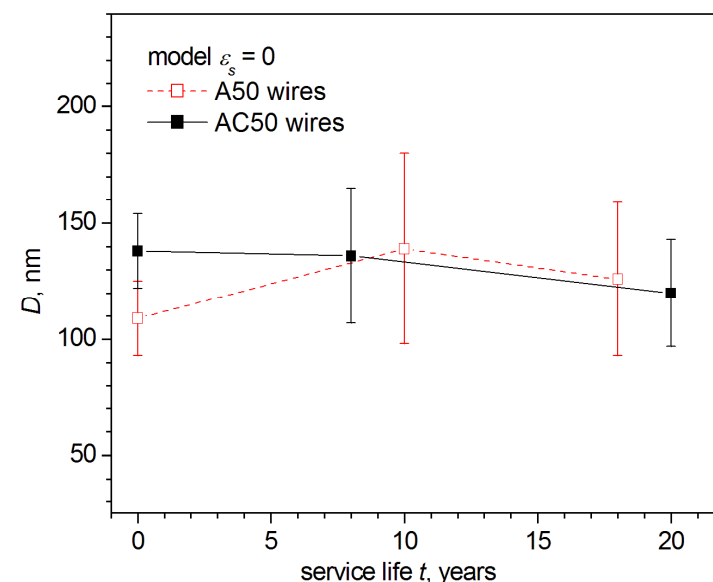

**Figure S1.** Comparison of dependences of the average crystallite size  $D$ , calculated within the framework of the zero microstrain model ( $\epsilon_s = 0$ ), on the service live duration  $t$  for Al-wires of A50 and AC50 type cables of the overhead power lines. The lines are guides to the eye.

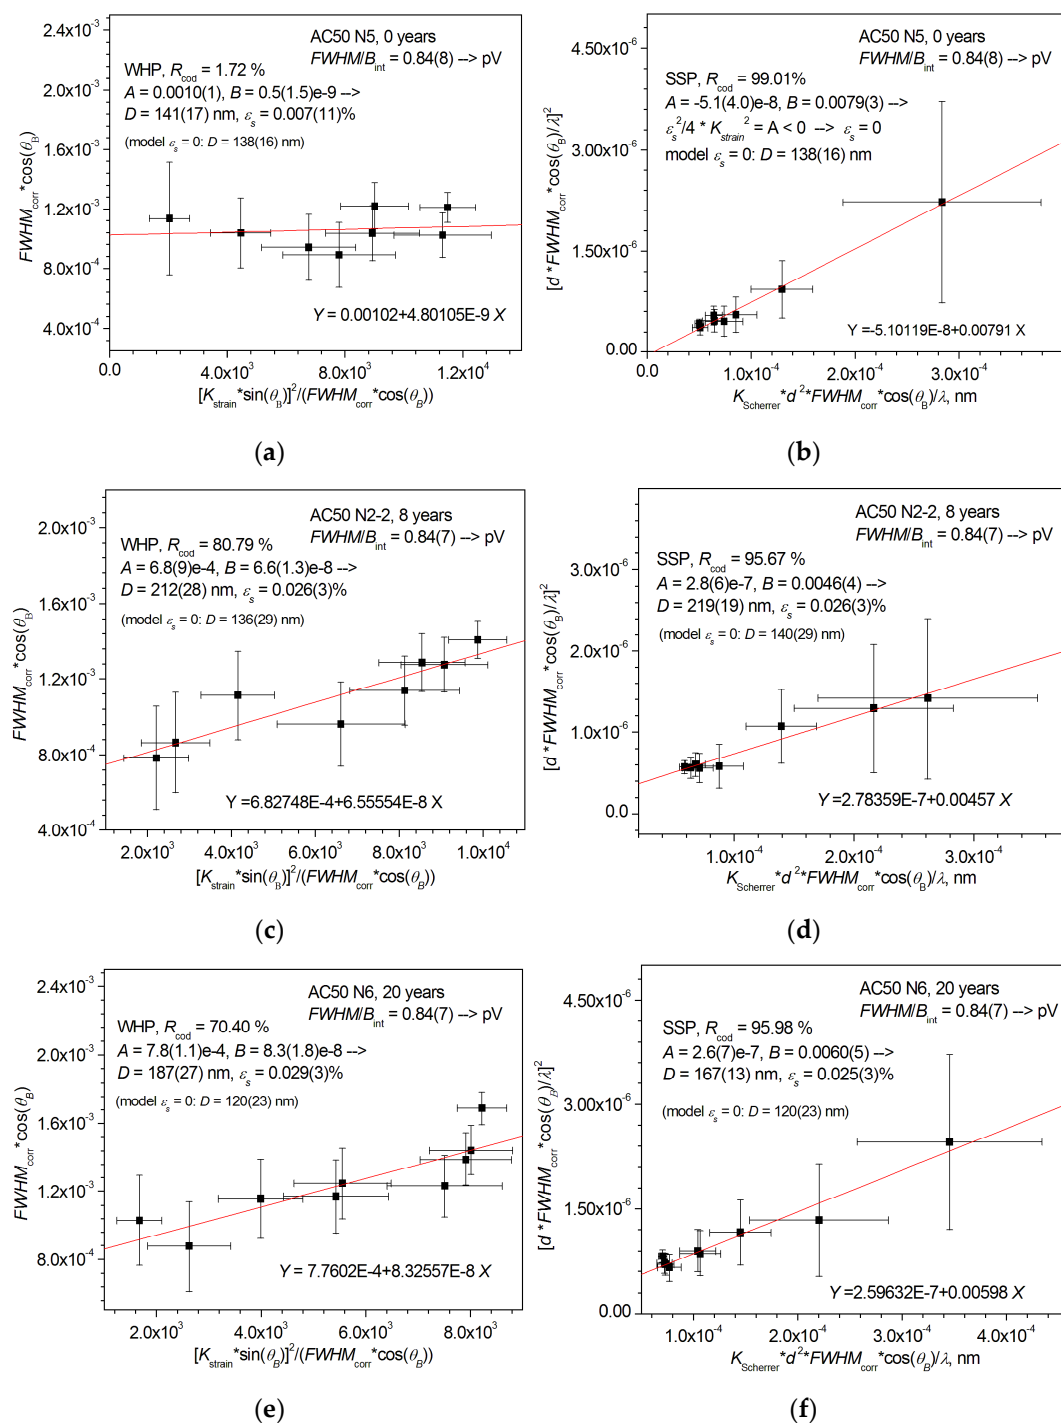

**Figure S2.** (a), (c), (e) WHP and (b), (d), (f) SSP of AC50 wires, without exploitation (a), (b) and after 8 (c), (d) and 20 (e), (f) years of exploitation.  $FWHM_{\text{corr}}$  is full width at half maximum of the XRD reflection corrected to instrumental broadening,  $\theta_B$  is half of Bragg angle  $2\theta_B$  of the reflection after angular corrections applied,  $d$  is interplane distance corresponding to Bragg angle  $2\theta_B$  of the reflection,  $K_{\text{Scherrer}} = 0.94$ ,  $K_{\text{strain}} = 4$ ,  $R_{\text{cod}}$  is coefficient of determination (see Ref. [1]),  $\lambda$  is the wave length of Cu- $K_{\alpha 1}$  radiation ( $1.540598 \text{ \AA}$ , after correction of Cu- $K_{\alpha 2}$  contribution). Equations of linear WHP/SSP graphs  $Y = A + B \cdot X$ , where  $X$  and  $Y$  are quantities shown in horizontal and vertical axes, respectively, are shown. Other designations are given in the text of the paper.

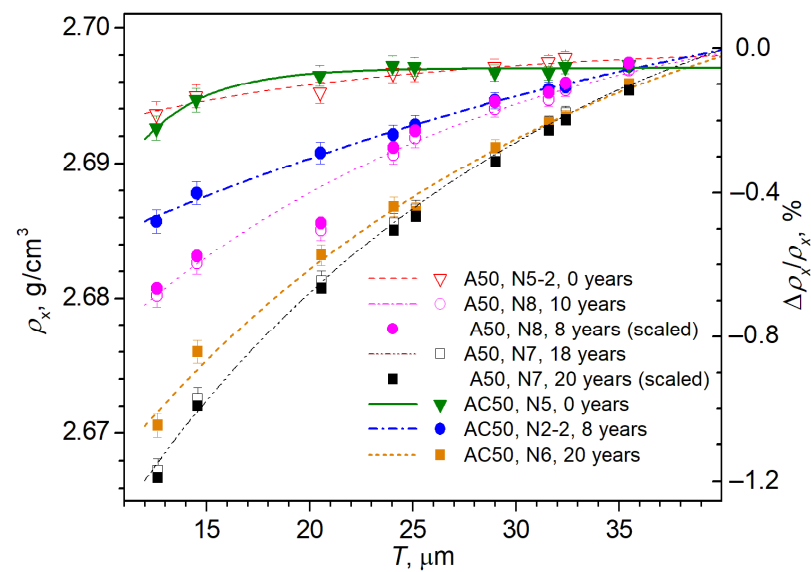

**Figure S3.** Distribution of the mass X-ray density  $\rho_x(T)$  of the wire Al material along the depth  $T$  from the surface of the A50 and AC50 wires. Samples are numbered according to Table 2 of the paper and their lifetimes are shown. At the right side, the axes are shown corresponding to the density defect  $\Delta\rho_x/\rho_x$ , which is estimated with respect to the bulk of the non-exploited sample of A50 type (N5-2, 0 years of operation). The approximation lines are drawn according to the exponential-decay law. The ‘scaled’ dependences are obtained from  $\rho_x(T)$  for A50 wires (service lives of 10 and 18 years) by subtraction/addition of corresponding quantity for 2 years, using the obtained rate of  $\rho_x$  change for A50 wires ( $-2.52 \cdot 10^{-4}$  g/cm<sup>3</sup>/years, see discussion of Figure 13(b) in the Section 3.4 of the manuscript).

## References

1. Levin, A.A. Program *SizeCr* for calculation of the microstructure parameters from X-ray diffraction data. Preprint, 2022. <https://www.researchgate.net/profile/Alexander-Levin-6/research>. doi: 10.13140/RG.2.2.15922.89280
